# Supplementary material for: The Possible Role of PD-1 Protein in Ganoderma lucidum–Mediated Immunomodulation and Cancer Treatment
Source: PubMed Central journal article supplement — Integr Cancer Ther. 2019 Oct 9;18:1534735419880275. doi: 10.1177/1534735419880275 (PMC6876169; doi:10.1177/1534735419880275), 2019-10-09

## Supplement Figure

**Figure 1.** The effect of DMSO on GLE-mediated PD-1 protein reduction in GM00130 human B-lymphocytes. The GM00130 human B-lymphocytes were first treated with DMSO or PMA/Io for 24 hours. The cells were then treated with GLE (0.5mg/ml) for 48 hours. The cell lysates prepared from the cells (15mg total protein/lane) were analyzed by immunoblotting to detect the levels of PD-1, AKT1, CD19, and  $\beta$ -Actin proteins in each cell lysate.

A. The effect of GLE treatment on PD-1 protein expression in GM00130 B-lymphocytes.

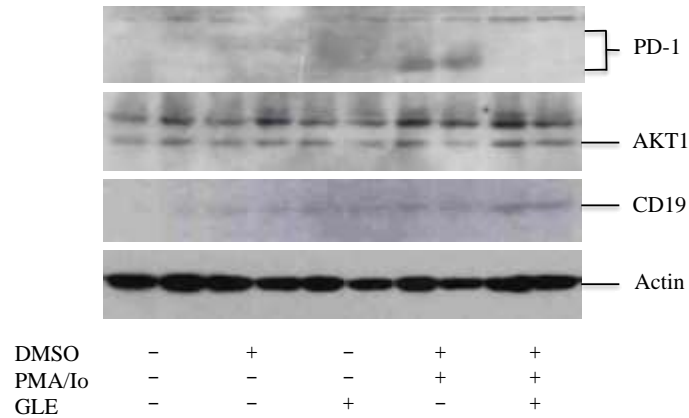

B. Quantification of PD-1 protein level in GM00130 cells.

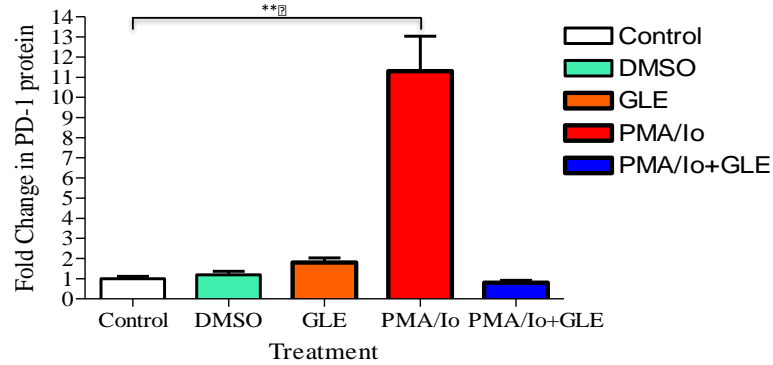

Supplement: Supplement_Figure.pdf [file Supplement_Figure.pdf]
